# Supplementary material for: Substitutional disorder: structure and ion dynamics of the argyrodites Li6PS5Cl, Li6PS5Br and Li6PS5I
Source: Royal Society of Chemistry journal article supplement (doi:10.1039/c9cp00664h), 2019-01-01
Supplement: c9cp00664h1.pdf [file c9cp00664h1.pdf]

## Substitutional disorder: Structure and ion dynamics of the argyrodites $\text{Li}_6\text{PS}_5\text{Cl}$ , $\text{Li}_6\text{PS}_5\text{Br}$ and $\text{Li}_6\text{PS}_5\text{I}$

I. Hanghofer,<sup>\*a</sup> M. Brinek,<sup>a</sup> S. L. Eisbacher,<sup>a</sup> Brigitte Bitschnau,<sup>b</sup> M. Volck,<sup>c</sup> V. Hennige,<sup>c</sup> I. Hanzu,<sup>a,d</sup> Daniel Rettenwander,<sup>a</sup> and H. M. R. Wilkening<sup>\*a,d</sup>

<sup>a</sup> Christian Doppler Laboratory for Lithium Batteries and Institute for Chemistry and Technology of Materials, Graz University of Technology (NAWI Graz), Stremayrgasse 9, 8010 Graz, Austria.

<sup>b</sup> Institute of Physical and Theoretical Chemistry, Graz University of Technology, Stremayrgasse 9, 8010 Graz, Austria

<sup>c</sup> AVL List GmbH, 8020 Graz, Austria

<sup>d</sup> Alistore-ERI European Research Institute, 33 rue Saint Leu, 80039 Amiens, France.

E-Mail: [wilkening@tugraz.at](mailto:wilkening@tugraz.at); E-Mail: [isabel.hanghofer@tugraz.at](mailto:isabel.hanghofer@tugraz.at)

The electronic supporting information contains results from Rietveld analyses (Figs S1, S2) and further information on NMR settings (Table S1);  $^{35}\text{Cl}$ ,  $^{79}\text{Br}$  and  $^{127}\text{I}$  MAS NMR spectra are shown in Fig. S3.

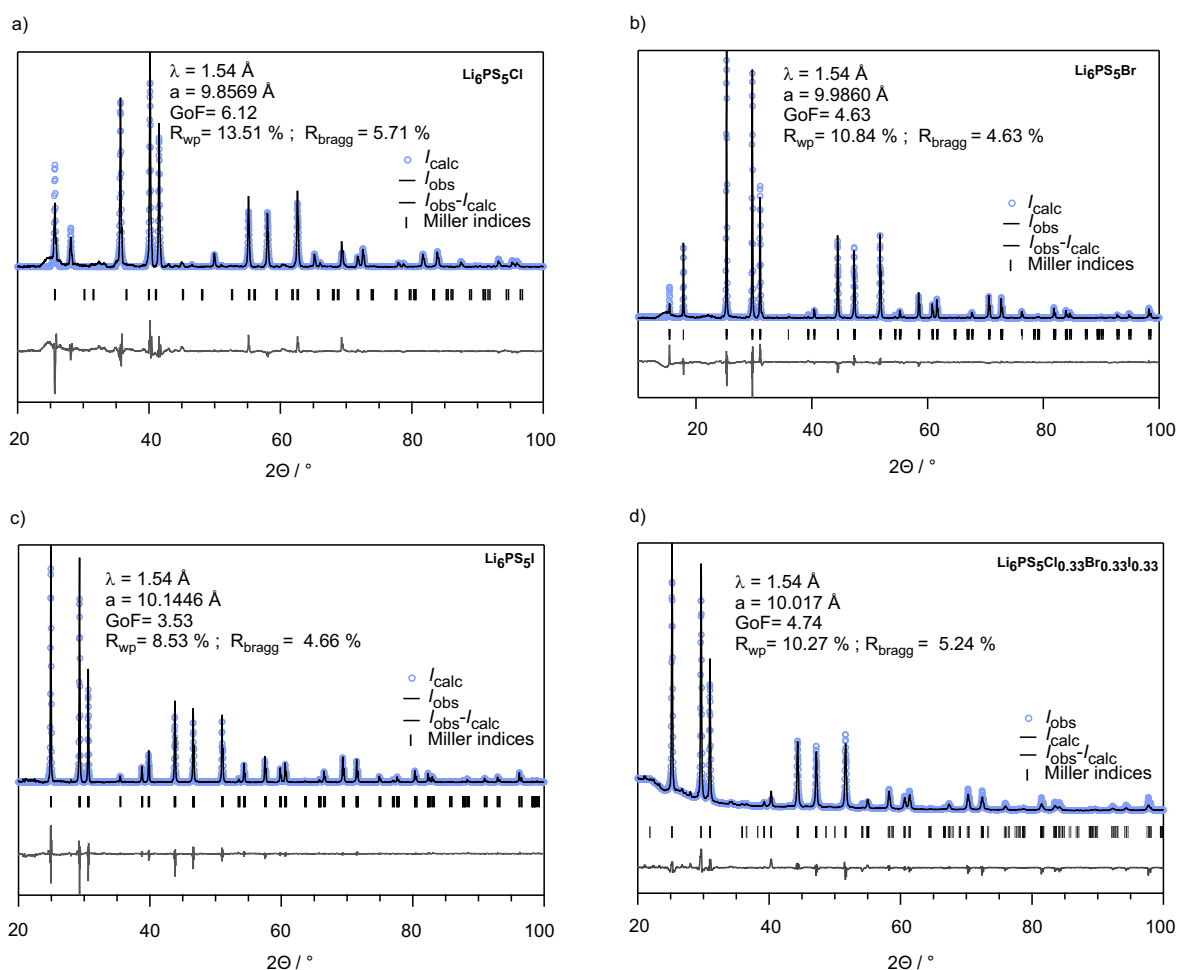

**Fig. S1** Crystallographic data of  $\text{Li}_6\text{PS}_5\text{Br}$ ,  $\text{Li}_6\text{PS}_5\text{Cl}$ ,  $\text{Li}_6\text{PS}_5\text{I}$ , and  $\text{Li}_6\text{PS}_5\text{Cl}_{0.50}\text{Br}_{0.50}$  obtained from X-ray powder diffraction. GoF means goodness of fit (GoF), the weighted  $R$ -profile ( $R_{\text{wp}}$ ) and the  $R$ -Bragg ( $R_{\text{Bragg}}$ ) values are also included. The differential plot as well as the  $hkl$  indices are shown, too. The hump at approximately  $25^\circ$  is due to the mercatpo foil, which was used for the measurement

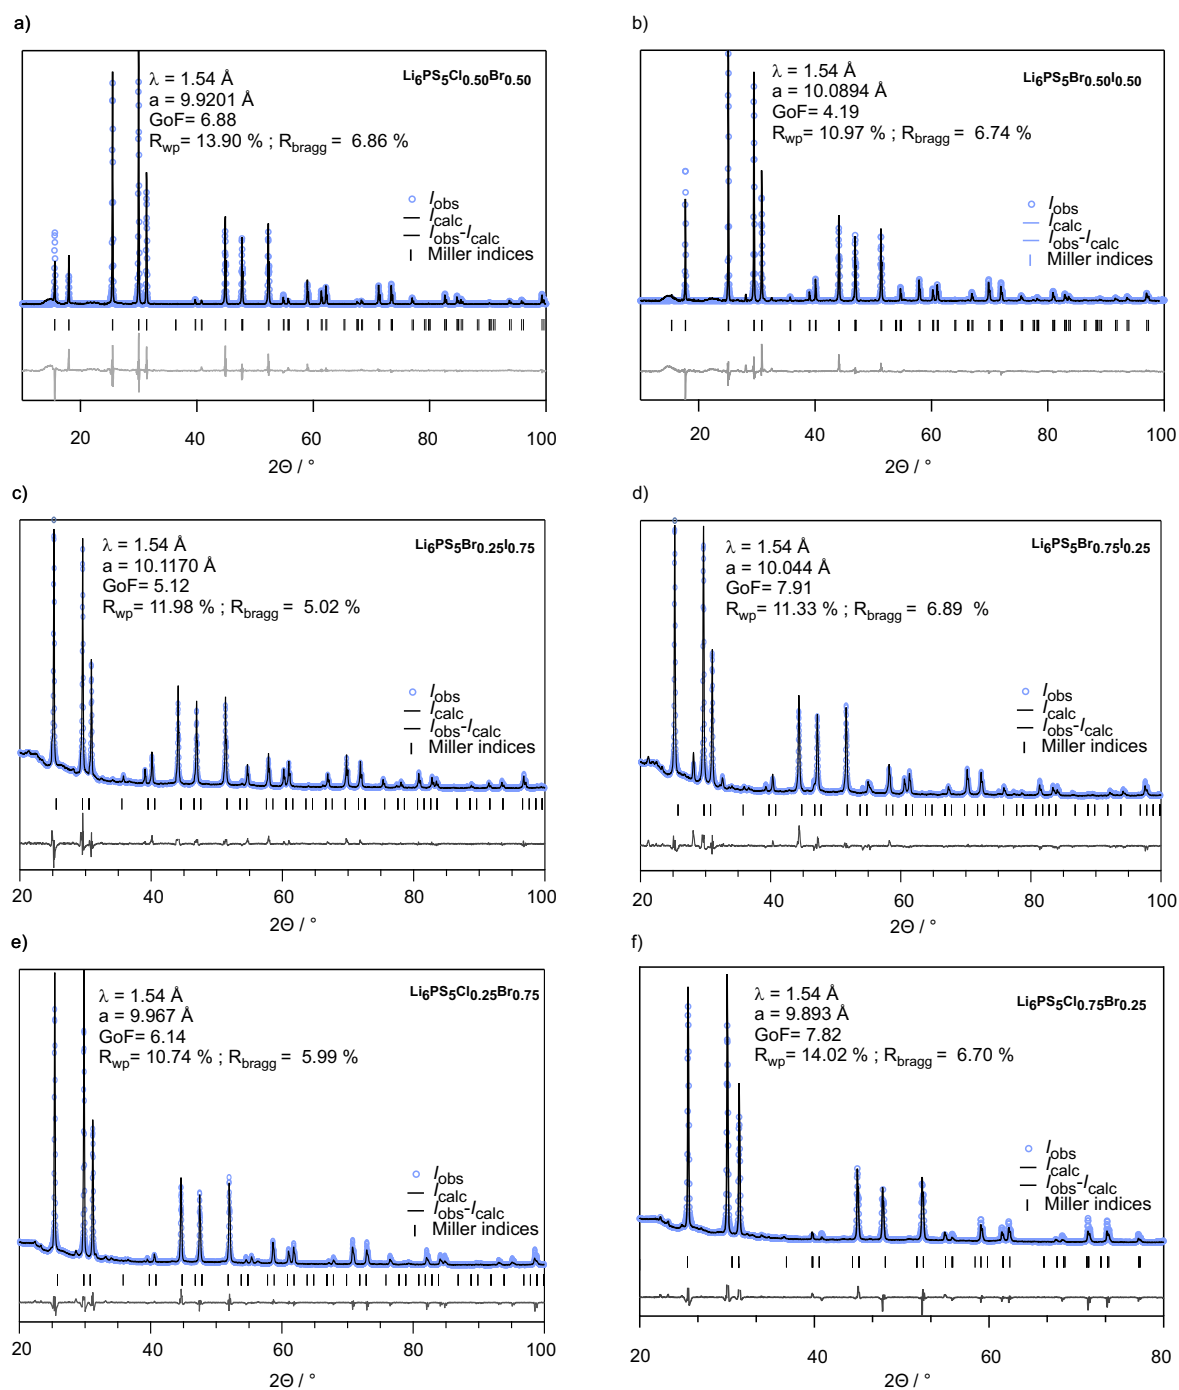

**Fig. S2** X-ray powder diffraction patterns and crystallographic data from Rietveld analyses of the Li-argyrodites indicated. As in Fig. S1, GoF means goodness of fit (GoF), the weighted  $R$ -profile ( $R_{\text{wp}}$ ) and the  $R$ -Bragg ( $R_{\text{bragg}}$ ) values are also shown. The differential plot as well as the hkl indices are included, too. The hump at approximately  $25^\circ$  is due to the mercatpo foil, which was used for the measurement

In Table **S1** the experimental settings of the magic angle spinning (MAS) NMR measurements are shown; The table includes pulse lengths and delay times for the  $^6\text{Li}$ ,  $^{31}\text{P}$ ,  $^{35}\text{Cl}$ ,  $^{79}\text{Br}$  and  $^{127}\text{I}$  NMR spectra. In Fig. S1 the corresponding spectra of  $^{35}\text{Cl}$ ,  $^{79}\text{Br}$  and  $^{127}\text{I}$  of  $\text{Li}_6\text{PS}_5\text{X}$  (X: Cl, Br and I) are presented.

**Table S1:** Settings to record the MAS NMR spectra of the argyrodites  $\text{Li}_6\text{PS}_5\text{Cl}$ ,  $\text{Li}_6\text{PS}_5\text{Br}$  and  $\text{Li}_6\text{PS}_5\text{I}$ , respectively. The pulse length varies from 1 to 4.5  $\mu\text{s}$  and the delay time from 1 s up to 180 s.

| sample                            | measurement      | pulse length      | delay time |
|-----------------------------------|------------------|-------------------|------------|
| $\text{Li}_6\text{PS}_5\text{Cl}$ | $^6\text{Li}$    | 3.0 $\mu\text{s}$ | 10 s       |
|                                   | $^{31}\text{P}$  | 1.0 $\mu\text{s}$ | 10 s       |
|                                   | $^{35}\text{Cl}$ | 4.5 $\mu\text{s}$ | 1 s        |
| $\text{Li}_6\text{PS}_5\text{Br}$ | $^6\text{Li}$    | 3.0 $\mu\text{s}$ | 10 s       |
|                                   | $^{31}\text{P}$  | 1.0 $\mu\text{s}$ | 30 s       |
|                                   | $^{79}\text{Br}$ | 1.3 $\mu\text{s}$ | 1.4 s      |
| $\text{Li}_6\text{PS}_5\text{I}$  | $^6\text{Li}$    | 3.0 $\mu\text{s}$ | 10 s       |
|                                   | $^{31}\text{P}$  | 2.0 $\mu\text{s}$ | 180 s      |
|                                   | $^{127}\text{I}$ | 3.0 $\mu\text{s}$ | 1 s        |

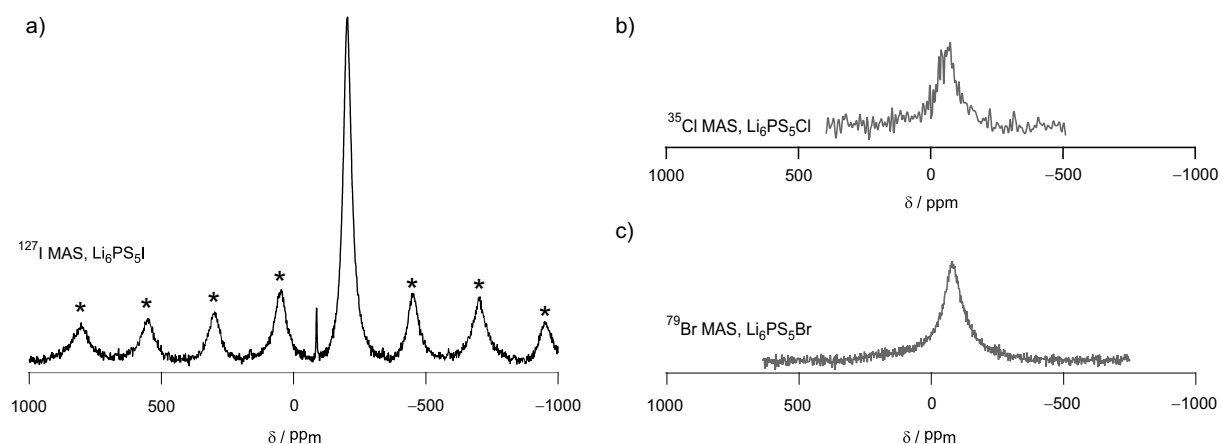

**Fig. S3**  $^{35}\text{Cl}$ ,  $^{79}\text{Br}$  and  $^{127}\text{I}$  MAS NMR spectra. Asterisks, see the NMR spectrum of  $\text{Li}_6\text{PS}_5\text{I}$ , denote spinning sidebands. The narrow line at  $-86.4$  ppm shows a negligible impurity phase.

MAS NMR spectra are recorded with ambient bearing gas and drive gas pressure. We measured the average temperature of the rotor with external thermocouples in the direct vicinity of the rotor. According to calibration routines using lead nitrate (or KBr), under the conditions described the mean temperature inside the rotor is  $34(2)^\circ\text{C}$ .
